# Supplementary material
Source: PubMed Central journal article supplement (PMC3144095)
Supplement: supp_0022034510385241_DS_10.1177_0022034510385241.pdf [file supp_0022034510385241_DS_10.1177_0022034510385241.pdf]

## RESEARCH REPORTS

### Biomaterials & Bioengineering

L. Gu<sup>1\*</sup>, Y.K. Kim<sup>2\*</sup>, Y. Liu<sup>3\*</sup>, H. Ryou<sup>4</sup>,  
C.E. Wimmer<sup>5</sup>, D. Lin<sup>6</sup>, D.D. Arola<sup>4</sup>,  
S.W. Looney<sup>5</sup>, D.H. Pashley<sup>7</sup>, and F.R. Tay<sup>7,8†</sup>

<sup>1</sup>Department of Operative Dentistry and Endodontics, Guanghua School of Stomatology, Sun Yat-sen University, Guangzhou, China; <sup>2</sup>Department of Conservative Dentistry, School of Dentistry, Kyungpook National University, Daegu, Korea; <sup>3</sup>Department of Stomatology, Tongji Hospital, Huazhong University of Science and Technology, Wuhan, China; <sup>4</sup>Laboratory of Advanced Materials and Processes, Mechanical Engineering Department, University of Maryland Baltimore County, Baltimore, MD, USA; <sup>5</sup>Department of Biostatistics, Medical College of Georgia, Augusta, GA, USA; <sup>6</sup>Department of Stomatology, The First Hospital of Wuhan, Wuhan, China; and <sup>7</sup>Department of Oral Biology and <sup>8</sup>Department of Endodontics, School of Dentistry, Medical College of Georgia, Augusta, GA 30912-1129, USA; \*authors contributing equally to this work; †corresponding author, ftay@mcc.edu

*J Dent Res* 90(1):82-87, 2011

## APPENDIX

### METHOD FOR DETERMINING COMPLETE DEMINERALIZATION OF MINERALIZED DENTIN POWDER

To ensure complete demineralization of the dentin powder, we periodically tested the acid demineralizing solution qualitatively

## Biomimetic Analogs for Collagen Biomineralization

for calcium using a 30 wt% dipotassium acetate solution. When we could no longer obtain a positive test for calcium (*i.e.*, white precipitate), we knew that all minerals had been removed.

**Appendix Table.** Estimates of  $K_{1/2}$  for Adsorption and Desorption after the Use of Two Time Periods of Chemical Phosphorylation of Sodium Trimetaphosphate ( $\text{Na}_3\text{P}_3\text{O}_9$ ) to Collagen Matrices

|            | Treatment Time | $B_{max}$ | $B_{max}/2$ | Estimate of $K_{1/2}$ | 95% CI ( $K_{1/2}$ ) | Approx. SE |
|------------|----------------|-----------|-------------|-----------------------|----------------------|------------|
| Adsorption | 5 min          | 96.036    | 48.018      | 1.021*                | 1.010-1.031          | 0.005      |
|            | 1 hr           | 95.849    | 47.924      | 0.934*                | 0.909-0.958          | 0.013      |
| Desorption | 5 min          | 74.630    | 37.315      | 1.033                 | 0.992-1.075          | 0.021      |
|            | 1 hr           | 79.322    | 39.661      | 1.054                 | 0.963-1.149          | 0.048      |

CI, confidence interval; SE, standard error.

\* Indicates a statistically significant difference ( $p < 0.001$ ) between 5 min and 1 hr in the adsorption group.

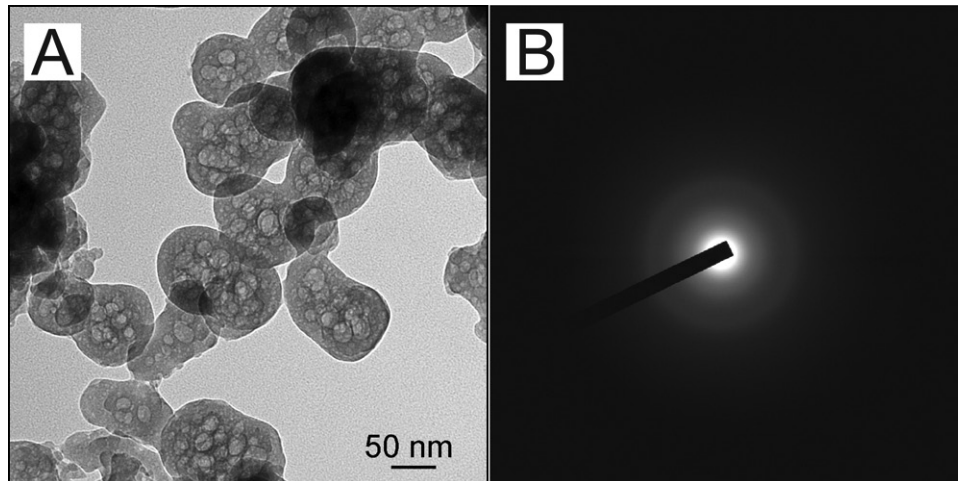

**Appendix Figure 1.** TEM and electron diffraction of amorphous calcium phosphate. **(A)** High magnification of the polyacrylic-acid-stabilized amorphous calcium phosphate nanoprecursors shown in Fig. 2C in the main paper. **(B)** The amorphous nature of nanoprecursors was confirmed by the diffuse nature and absence of ring patterns in the accompanying selected area electron diffraction image.

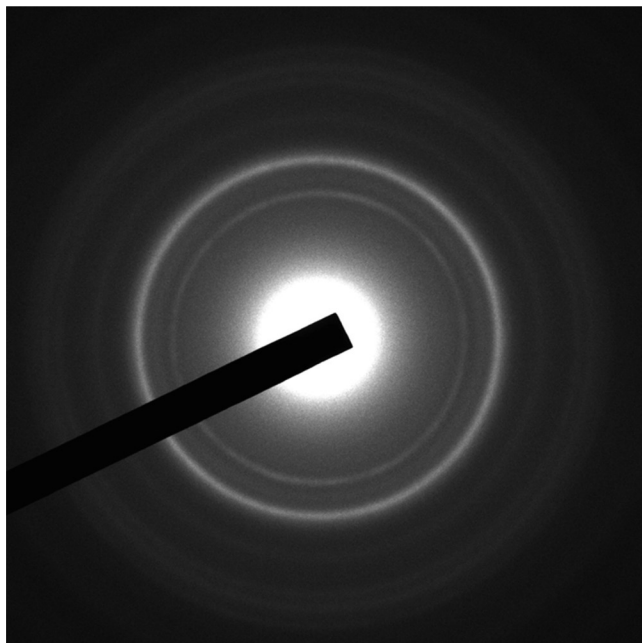

**Appendix Figure 2.** Since our interest is in biologic apatite and not stoichiometric hydroxyapatite, we include a standard of apatite that we prepared from non-demineralized dentin for comparison with the intrafibrillar minerals identified from the mineralized collagen fibrils shown in Figs. 3C and 3D in the main paper.

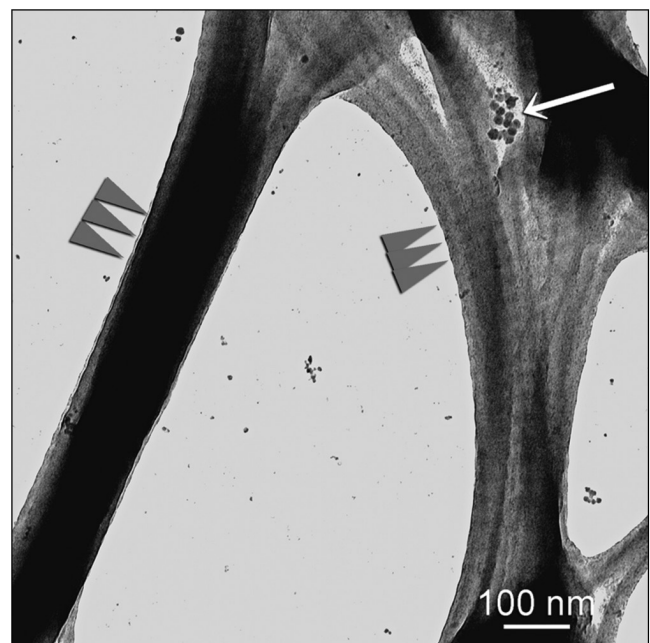

**Appendix Figure 3.** Unstained TEM image of moderately mineralized reconstituted type I collagen fibrils derived from calf skin. The collagen was treated for 5 min with 2.8 wt% hydrolyzed and pH-adjusted sodium trimetaphosphate and subjected to mineralization in a 0.28 mM polyacrylic-acid-containing simulated body fluid placed over a calcium- and hydroxyl-ion-releasing Portland-cement-based resin composite. The periodic external elevations along the mineralized fibrillar surfaces (solid gray arrowheads) corresponded to the periodicity observed within the fibrils. Arrow: remnant amorphous calcium phosphate nanoprecursors.
